# Supplementary material for: Strong-correlation induced high-mobility electrons in Dirac semimetal of perovskite oxide
Source: PubMed Central journal article supplement (PMC6341165; doi:10.1038/s41467-018-08149-y), 2019-01-21
Supplement: 41467_2018_8149_MOESM2_ESM.pdf [file 41467_2018_8149_MOESM2_ESM.pdf]

**Editorial Note:** This manuscript has been previously reviewed at another journal that is not operating a transparent peer review scheme. This document only contains reviewer comments and rebuttal letters for versions considered at Nature Communications.
