# Supplementary material for: Strong-correlation induced high-mobility electrons in Dirac semimetal of perovskite oxide
Source: PubMed Central journal article supplement (PMC6341165; doi:10.1038/s41467-018-08149-y), 2019-01-21
Supplement: 41467_2018_8149_MOESM3_ESM.pdf [file 41467_2018_8149_MOESM3_ESM.pdf]

## Description of Additional Supplementary Files

### Supplementary Data 1

The source file of Supplementary Fig. 5e with statistical values.

### Supplementary Data 2

The structural parameters of perovskite  $\text{CaIrO}_3$ .
